# Supplementary material
Source: PubMed Central journal article supplement (PMC6732043)
Supplement: NIHMS1537472-supplement-125_2019_4963_MOESM1_ESM.pdf [file NIHMS1537472-supplement-125_2019_4963_MOESM1_ESM.pdf]

## Methods

**Insulin** Baseline and glucose-stimulated insulin response was assessed on separate days to minimize stress from tail bleeding. Animals were fasted for 6 hours prior to baseline assessment of insulin. Because of the difficulty in detecting an additive effect of the DPP-4 inhibitor and glucose on insulin levels in the control animals, plasma insulin was assessed at either 5 or 15 minutes after a glucose load (2g/kg).

**Baseline levels of proglucagon derived product** Blood was collected 5-6 hours into the light cycle in *ad lib* fed mice in heparinized syringes and placed in a tube with a mixture of DPP-4 inhibitor (Millipore, Burlington, MA, USA), heparin, EDTA, and aprotonin. Plasma was assayed for total GLP-1 using sandwich ELISA kits (K150JWC-1, Mesoscale Discovery, Rockville, MD, USA) and total mouse GIP using an ELISA (EZRMGIP, Millipore Sigma).

**ESM Table 1**

|                         | Control     | <i>GcgRA</i> <sup>ΔPDXCre</sup> | <i>GcgRA</i> <sup>ΔVilCre</sup> | <i>GcgRA</i> <sup>ΔNull</sup> |
|-------------------------|-------------|---------------------------------|---------------------------------|-------------------------------|
| Body Weight (g)         | 27.1 ± 2.4  | 27.8 ± 2.3                      | 32.9 ± 1.8*                     | 30.2 ± 2.8*                   |
| Fasted glucose (mmol/L) | 9.5 ± 0.4   | 9.3 ± 0.3                       | 9.6 ± 0.3                       | 9.1 ± 0.4                     |
| Total GLP-1 (pM)        | 9.1 ± 4.1   | 5.2 ± 2.7                       | 4.4 ± 1.6                       | undetectable                  |
| Total GIP (pM)          | 29.4 ± 19.6 | 32.3 ± 8.9                      | 15.7 ± 5.0                      | 48.1 ± 22.3                   |

\* p<0.05 compared to control and *GcgRA*<sup>ΔPDX1Cre</sup> groups. Mean ± STDEV.

**ESM Figure 1**

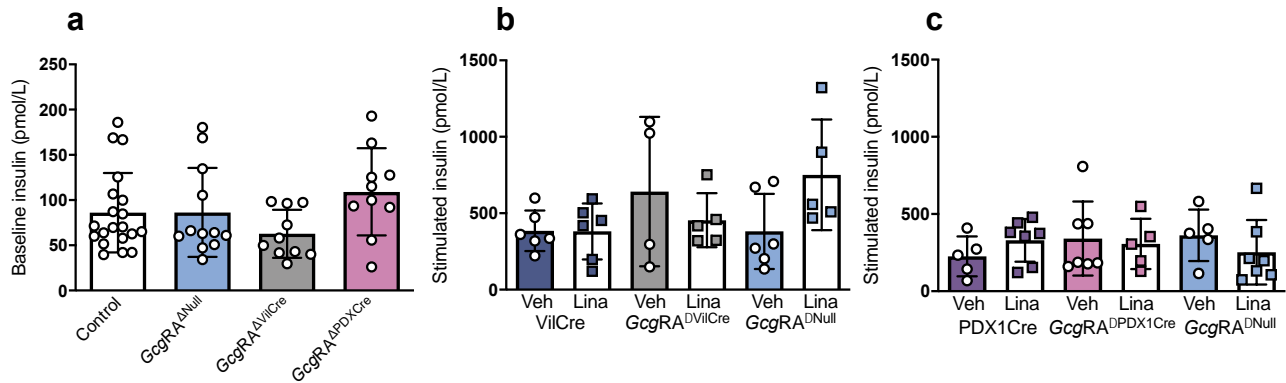

**Fig 1. Insulin response to linagliptin.** (a) Baseline insulin levels after a 6 hour fast in control (*VilCre* and *PDX1Cre*), *GcgRA*<sup>ΔNull</sup>, *GcgRA*<sup>ΔVilCre</sup>, and *GcgRA*<sup>ΔPDX1Cre</sup> mice. (b) Insulin levels 15 minutes after oral glucose (2g/kg) and 30 minutes after linagliptin (10mg/kg) in *VilCre*, *GcgRA*<sup>ΔVilCre</sup>, and *GcgRA*<sup>ΔNull</sup> mice. (c) Insulin levels 5 minutes after oral glucose (2g/kg) and 30 minutes after linagliptin (10mg/kg) in *PDX1Cre*, *GcgRA*<sup>ΔPDX1Cre</sup>, and *GcgRA*<sup>ΔNull</sup> mice.

**ESM Figure 2**

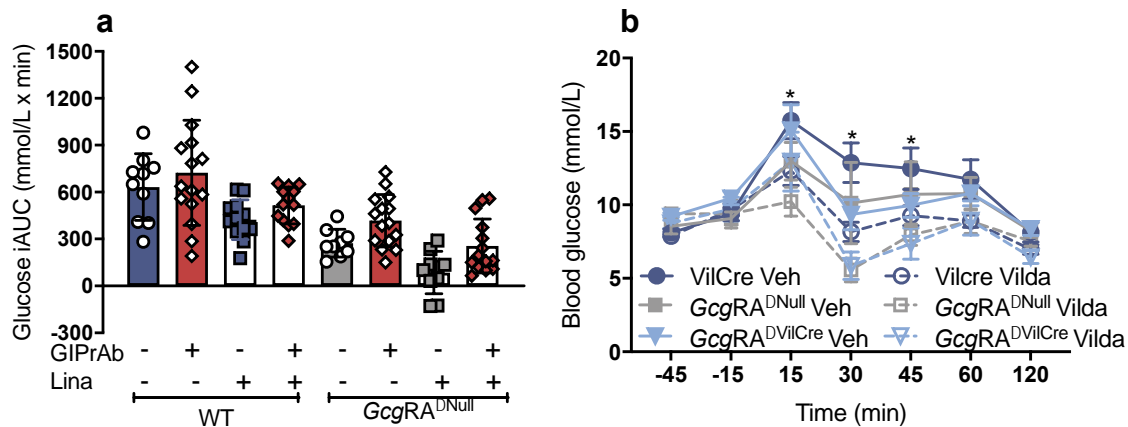

**ESM Fig. 2. Data corresponding Fig 4.** (a) iAUC corresponding to Figure 4a,b ( $p < 0.0001$ , main effect of genotype;  $p < 0.0001$ , main effect of linagliptin across genotypes;  $p < 0.001$ , main effect of

GIPrAB across genotypes). **(b)** Glucose excursion line graph corresponding the iAUC graph in Fig **4c** ( $p < 0.0001$ , time x genotype interaction;  $*p < 0.05$ , time x vildagliptin interaction across genotypes;  $n = 5-7$ ).
